# Supplementary material for: Intercomparisons of δ 13 C and δD measurements of atmospheric CH 4 for combined use of datasets from different laboratories
Source: Copernicus journal article supplement (doi:10.5194/amt-2017-281), 2017-08-09
Supplement: Supplementary file [file amt-2017-281-AC2-supplement.pdf]

Response to Referee #2 by Umezawa et al.

We thank the reviewer for the thorough reading for the many corrections and the insightful suggestions, especially for the rigor in metrology and terminology and suggestions to make this paper more broadly acceptable in the CH<sub>4</sub> research community.

According to the reviewer's suggestion, in the revised manuscript, we have added a new section that addresses an overview of the IRMS-based measurement techniques for isotope ratios of CH<sub>4</sub>, standard scales and current problems that may contribute to the observed measurement offsets among laboratories. Accordingly, related places in other sections have been also reformulated. We hope this additional introduction will help non-expert readers to follow the contents.

We have defined use of the term "calibration" in the revised manuscript. It means in this study a measurement of a gas at a laboratory against a standard at higher hierarchy level of the standard scale and to assign the gas a  $\delta^{13}\text{C-CH}_4$  or  $\delta\text{D-CH}_4$  value traceable to the standard scale. According to this, we found the term "calibration offset" used in the original manuscript inaccurate, because the offsets summarized here do not necessarily come from calibration only (as pointed out by the other referee Dr. Sergey Assonov). We use "measurement offset" as suggested by the reviewer.

Our responses are detailed below, in which **Comments from reviewers** and our responses are given in different styles.

---

***The authors take on the difficult and important task of summarizing comparisons of measurements of CH<sub>4</sub> stable isotopes in air at CH<sub>4</sub> levels appropriate for the current atmosphere and air extracted from ice cores. Done properly, this would give data users correction factors to combine data from different laboratories and give them an understanding of the major issues involved so they fully understand the limitations of the combined data sets. This would allow more CH<sub>4</sub> isotope data to be used in studies of the global CH<sub>4</sub> budget. Unfortunately, the paper seems to be written for isotope measurement experts, like the authors, rather than for data users who may be very interested in more CH<sub>4</sub> isotopic***

*composition measurements in their studies. It contains too much jargon and too little explanation of the major issues that prevent labs from preparing a combined data set for CH<sub>4</sub> isotopes with meaningful temporal and spatial gradients. These issues seem to be inherent in the community's measurement approach. But what are those issues? Are they associated with deficiencies in measurement techniques themselves and how instruments are calibrated? Is there a lack of appropriate isotope standards for CH<sub>4</sub>? Is the issue with propagating standard scales from carbonates (<sup>13</sup>C) or water (D/H) to CH<sub>4</sub> in air? The fundamental hierarchy of standards used within the CH<sub>4</sub> isotope community should be described; much of what is described seems to violate good metrological practice. Are sample collection or processing methods causing differing amounts of fractionation among labs? These are just some possibilities from a non-expert. I suggest that a brief, systematic description of the important issues involved in making measurements of atmospheric CH<sub>4</sub> isotopic composition and ultimately preparing a consistent data set across measurement labs is given in Section 2. This would be especially useful to data users and also help the authors focus on how to move forward.*

We thank the reviewer for the valuable comment. According to the reviewer's suggestion, we have added a new section to present systematic descriptions of the measurement overview and critical issues. We have modified the manuscript at related places accordingly.

*This study is supposed to help scientists utilize more CH<sub>4</sub> isotopic data by providing correction factors to make data from different labs more compatible, but are the data sets available? A quick look at the World Data Center shows only NIWA and NOAA data have been updated within the past couple years for <sup>13</sup>CH<sub>4</sub>, and the only other data set, quite outdated, is from Tohoku University. Are the data from ice core and firn air available? Do other labs make data available through their institutes' web sites? That issue aside, using the comparison information in the paper is complicated by Kr interference; it is not always clear where a correction has been applied and, as a result, what data sets the information in this paper is appropriate for. It gives the impression that the paper*

***was written before the isotope measurement community is ready for such an effort to be more generally useful to the CH<sub>4</sub> research community.***

We have compiled information on data availability from each laboratory and it is included in the revised manuscript. We have also clarified the procedures and corrections for the Kr interference. We admit that not all problems are resolved by our manuscript. To reach this in the future, we need to establish a forum to advance compatibility of the datasets. This study addresses the current reality and establishes a baseline for steps forward. We believe that our study will help future efforts in the isotope measurement and also broader CH<sub>4</sub> research communities.

***It was surprising that XCH<sub>4</sub> (i.e., CH<sub>4</sub> mole fractions) was not reported in the paper, at least for the cylinders that were circulated as part of this study. It is important that CH<sub>4</sub> measurements agree among labs measuring air from ice cores and the modern atmosphere to get radiative forcing correct, and this is a good forum to show that level of agreement.***

Intercomparison of measurements of CH<sub>4</sub> mole fraction is out of scope of this study. Laboratories participating in this study are all specialized for isotope measurements, but we do not investigate mole fraction measurements in each laboratory. There are established activities rigorously concerning on compatibility issues of CH<sub>4</sub> mole fraction (regular GGMT meetings and following WMO/GAW report).

***The manuscript is poorly written. It is far too wordy. While the first author is not a native English speaker, there are at least 10 authors who are. Shame on all of you for not improving the English. Language is often vague. Scientific terms are misused.***

***Overall, I think the work described in the paper is important, despite that the community is not yet capable of preparing useful combined data sets. I recommend that the paper is re-evaluated for acceptance after the authors respond to the comments in this review to the satisfaction of the journal editor.***

We apologize and we are deeply ashamed. We have revised the text to improve

conciseness and formulations.

**General comments: 1. Use appropriate metrological terms. "Precision" is a qualitative term, yet it is used as a quantitative measure of the noise or uncertainty in a measurement system. Is it short-term noise (repeatability) or does it represent long-term variations of a measurement system (reproducibility)? When the proper terms are used, how are they quantified? More appropriately, uncertainty should be stated with its confidence interval.**

We have revised and complemented the text. Concerning the measurements at many laboratories, however, detailed descriptions about how to evaluate the quality of the respective measurements have been given in the literature. We avoid repetition and refer to the original papers from each laboratory.

**2. Calibration: paraphrased, it links the measured response of an analyzer to the known values of standards. In the text, it seems to be confused with standard, and its use is often unclear. Given that, terms like "calibration offsets" are vague. Are the standards different? Is the issue with propagation of the standards? Could the offset result from fractionation during sample processing?**

We thank the reviewer for this comment. We have reformulated the texts to avoid confusions. We have defined the term "calibration" and the term "standard" is now used more rigorously in the revised manuscript.

**3. Differences between labs are often given with standard errors; I think standard deviation would be a better metric. In cases where  $n$  is large, e.g., for ongoing comparisons that happen over years, standard error exaggerates how well the difference is known.**

We partly agree to the reviewer. We have replaced standard errors with standard deviation at some places where large number of  $n$  could be misleading, but in this study we are interested in difference of the mean of measurements expected for the whole data population in individual laboratories (represented by standard error) rather than

difference of measurements with limited number from one-shot comparison (represented by standard deviation).

**4. Remove unnecessary words: assessed to be... comparison exercises (delete "exercises") evaluated to be X L in volume (delete "in volume") considered to be "in the time period" and "the years" offset value (delete "value")**

We have revised the text for conciseness throughout the manuscript.

**5. Each participant in measurement of CH<sub>4</sub> isotopes from the circulated cylinder should report XCH<sub>4</sub>.**

As written for the earlier comment, comparison of CH<sub>4</sub> mole fraction measurements is beyond the scope of this paper.

**6. "Concentration" is misused. In most cases, it can be deleted, because the unit provided (ppb) defines the measured quantity.**

We used the term "concentration", because it has been used conventionally over long years in the greenhouse gas research community. In the revised manuscript, we have replaced the term with "mole fraction".

**7. Why were other labs measuring CH<sub>4</sub> isotopic composition not included (e.g., Oregon State University)?**

We believe that we have covered all laboratories that specialize isotope measurements of atmospheric CH<sub>4</sub> at operational level. By personal communication, we have confirmed that the group studying air from ice core samples at Oregon State University does not measure CH<sub>4</sub> isotope ratios.

**8. What are the main sources of differences among labs? You imply it is differences in standard scales, but why? Don't the working standard scales propagate back to a primary scale, e.g., VPDB for 13C?**

This is related to the earlier general comment 2. We seem to have confused the reviewer due to inconsistent use of terms like “scale” and “calibration”. Possible causes are multiple such as differences in instrument settings (including the Kr interference), use of reference materials and resultant realization of the standard scale, and data correction and management applied in each laboratory. For clarity, all laboratories report on the VPDB/VSMOW scale. According to the reviewer’s suggestion, we have added a section to describe related information more systematically.

***9. What is the path forward, beyond what was mentioned regarding newly-developed standards? Many deviations from good metrological practice, especially regarding propagation of isotope standard scales, have occurred within this community. The new standards, although developed using an approach that may not be defensible in a pure metrological sense, seems practical given the limited resources of the measurement community. Is that alone sufficient? What else needs to be done to make existing data more compatible? How could new laser-based spectroscopic methods help this measurement community and the science? What else could improve the quality and compatibility of measurements of CH<sub>4</sub> isotopic composition across the labs involved here and beyond to others? As mentioned, data availability is not considered.***

We thank the reviewer for this comment. It is true that metrological practice has not been complete within the CH<sub>4</sub> isotope measurement community; individual laboratories have made efforts for best scientific outcome with limited resources at that time. We hope that our publication will lead to a discussion on the path forward for improving compatibility of available datasets. This study, which summarizes historical and currently ongoing measurements, is the first step. A new round robin comparison for isotope ratios of CH<sub>4</sub> is already planned as a next step, which is the first attempt for direct comparison among most laboratories that have currently ongoing measurement programs (in contrast our paper reports an estimate of offsets based on a number of patchy comparisons in history). In the meantime we need to establish a discussion forum suitably for instance in the GGMT meeting to better address causes of

measurement offsets and unify data management in different laboratories in order to decrease the offset. We can make these efforts together with laboratories operating ongoing programs. For existing datasets from laboratories that have closed down their isotope measurement programs, offsets given in this study represent the best estimates and a significant change is not be expected unless new information is brought up through upcoming discussions.

Progress in optical techniques is impressive. For instance measurement of mole fractions has become less cumbersome. New laser-based measurements will likely help to improve isotope analysis, avoiding the need for chemical conversions which could cause specific isotopic fractionations. Since an IRMS-based measurement is still a standard method, careful studies to establish the relationship between IRMS- and laser-based techniques are needed. Discussion on usability of laser spectroscopy is however beyond the scope of this study.

Regarding data availability, we have provided a table that includes how to access datasets.

***Specific comments:***

***P1L32: suggest ..from an inter-laboratory comparison of measurements.... (Also for title.)***

We have corrected the sentence as suggested. The manuscript title has been changed to: Inter-laboratory comparison of  $\delta^{13}\text{C}$  and  $\delta\text{D}$  measurements of atmospheric  $\text{CH}_4$  for combined use of datasets from different laboratories.

***P1L32: ..among worldwide...***

Corrected as suggested.

***P2L3: What does "the data" refer to? The differences among labs?***

We have changed the sentence to: “the difference among laboratories at modern atmospheric  $\text{CH}_4$  level spread...”

***P2L4-5: As presented, it is not clear how this will help combine data sets. It could be more clear if a table was given of available data sets and if (i.e., with respect to Kr interference), and how, the offsets in the paper apply.***

We will present a table listing available datasets and describe how to apply the offsets in the discussion section.

***P2L8-12: The description of how CH<sub>4</sub> isotopes are used to constrain the CH<sub>4</sub> budget could be stated more clearly. I suggest something like "The mass-weighted average delta-13C of emissions from all sources will equal the delta-13C of atmospheric CH<sub>4</sub>, after correction for fraction by removal processes." While you give some references for studies that use isotopes of CH<sub>4</sub> (some are poor examples), you don't reference early literature that identified their usefulness (e.g., Stevens).***

We have added the following sentence and a citation of Stevens and Rust (1982) and Cicerone and Oremland (1988) here.

Dictated by global mass balance, the average isotopic composition of CH<sub>4</sub> in the atmosphere ( $\delta^{13}\text{C-CH}_4$  or  $\delta\text{D-CH}_4$ ) equals the flux-weighted isotopic composition of the sources, corrected for the total kinetic isotope effects of removal processes (e.g. Stevens and Rust, 1982; Cicerone and Oremland, 1988; Quay et al., 1991, 1999; Miller et al., 2002; Turner et al., 2017; Rigby et al., 2017).

***P2L21: Is not this ratio more generally rare/common isotope, i.e., more abundant isotope in denominator?***

We thank the reviewer for this correction. The sentence has been changed to:

“...R represents the atomic ratio of the less abundant over the most abundant isotope in the sample and the standard, respectively.”

***P3L3: Condensable? At what temperature? How about CO? Why not describe the method directly?***



Since a detailed technical explanation is out of scope, we keep a brief description, but changed the sentence to:

The original methodology was based on the combustion of CH<sub>4</sub> in sample air, but interfering compounds such as CO<sub>2</sub>, H<sub>2</sub>O, N<sub>2</sub>O, CO and nonmethane hydrocarbons had been removed cryogenically, chemically or by gas chromatography before combustion of CH<sub>4</sub>.

***P3L17: "types of" is vague. Be more specific or delete it.***

We have changed the sentence to: ...to quantitatively separate different CH<sub>4</sub> source categories (...).

***P3L24: delete "datasets".***

Corrected as suggested.

***P4L1: "reliable calibrations"? Do you mean being able to reliably characterize the response of your instrument with standards, or do you refer to the standards themselves? The following discussions of "calibrations" is vague.***

Here we meant accuracy of measurements, that is, reliable link to the standard. The original wording was replaced to “traceability to the standard scale”. We have defined the term “calibration” in the revised manuscript.

***P4L4: "primary calibrations"? Do you mean calibration of primary standards? What defines the primary standard scale for CH<sub>4</sub> isotopes?***

The standard scale for  $\delta^{13}\text{C-CH}_4$  ( $\delta\text{D-CH}_4$ ) is VPDB (VSMOW), and here we use the term calibration as a measurement of laboratory reference gases relative to certified reference materials to link ambient air measurements in the laboratory to the standard scale. We have deleted the term “primary”.

***P4L9+: What is the Kr interference? I assume it is something with same***

***mass/charge as the "CH<sub>4</sub>-derived peak"?***

We have added the following sentences:

Schmitt et al. (2013) demonstrated that the doubly charged krypton isotope  $^{86}\text{Kr}^{2+}$ , produced in the ion source of an IRMS, can cause lateral tailing extending into the Faraday cups used for  $\delta^{13}\text{C}$  analysis (i.e. m/z of 44, 45 and 46), which compromises the measured signal of the CH<sub>4</sub>-derived peak.

***P4L11: What is the "CH<sub>4</sub>-derived peak"?***

We have changed the sentence to: ...from the CO<sub>2</sub> peak generated from CH<sub>4</sub> oxidation in sample air (hereafter CH<sub>4</sub>-derived peak) (Schmitt et al., 2013).

***P4L26: You are summarizing the analytical methods used by each laboratory, not reviewing the labs.***

We have changed the word “review” to “summarize” in the sentence.

***P5L6: In place of standard errors, standard deviations (with "n" given) should be used.***

See our response to the reviewer’s general comment 3.

***P5L9+: I think the general discussion of techniques (DI-IRMS, GC-IRMS, and optical), calibration, propagation of standards and their traceability to fundamental SI quantities, limitations of current methods, interferences, memory effects (scale compression?), etc. would be useful to isotope data users and fit better here (section 2) rather than in the introduction. This would be a good place to define how metrics like repeatability and reproducibility are quantified and other terms that might be unclear to non-specialists.***

According to this suggestion, we have added a new section and reformulated the related sections.

***P5L15: replace "the early years" with a year or range of years.***

We have replaced it with the year 1988.

***P6L19-20: How can calibrations of an instrument in one lab be the basis of calibrations in another lab? Do you mean the standards developed at MPIC were propagated to IMAU?***

It is indeed propagation of the standard scale from one laboratory to another. We have tidied up the confusing use of “calibration”.

***P6L25: unclear what "calibrations were made against ..." means. What do these abbreviations mean? Was water from these standards injected directly into the spectrometer, or were intermediate standards traceable to them injected? This is used other places, too.***

For clarity, we have added an explanation about these standards at an early part of this section.

***P7L5: what is "a working standard air"?***

It means air (filled in a cylinder) that was measured against standards at higher hierarchy level and that is routinely used to link sample measurements to the standard scale. We have given a description of use of these terms in the newly added section.

***P7L21: delete "because of"***

Corrected as suggested.

***P9L19-20: Kr interference is significant.***

Corrected as suggested.

***P9L21: Correction of the data for Kr interference ...***

Corrected as suggested.

***P9L23: "Kr removal"? do you mean only these data were corrected for Kr interference?***

We have changed the sentence to: ...have not been interfered by Kr.

***P9L25: ..RHUL) measured atmospheric ... using....***

Corrected as suggested.

***P10L9: How can one lab share its "calibration" with another. They shared standards?***

The term “calibration” was replaced with “standard scale”.

***P10L16: "calibration is made against gas bottles"? What is in the "gas bottles"? What standard is it traceable to?***

The gas bottles are filled with H<sub>2</sub> gas measured and certified by the Oztech Gas Company. We have added “H<sub>2</sub>” in the sentence.

***P10L21-22: "anchored to the INSTAAR calibration"?***

The sentence was changed to: This standard value is anchored to the standard scale used at INSTAAR (...).

***P10L23: "overall measurement precision"? How is that different from "precision", repeatability, or reproducibility?***

Measurement from ice core sample needs extraction of air occluded in ice. This is an additional procedure compared to measurements of sample air made at other laboratories. We have changed the sentence to: The overall measurement reproducibility for ice core sample (including extraction of air from an ice sample) was ...

***P10L25: What is "an Antarctic bottled air" ?***

It was replaced by “a high pressure cylinder filled at the Alert Station”.

***P11L7: You can not transfer a standard scale by measurement of a single sample or even multiple samples. Comparisons of measurements can not replace propagation and maintenance of a standard scale.***

The sentence was modified to: The  $\delta^{13}\text{C-CH}_4$  measurements are linked to the UHEI standard scale via comparison of measurements of an Antarctic air sample (...).

***P11L18: Dates (or ranges) should be given for each comparison.***

Measurement dates or periods are given wherever known.

***P12L6-7: TU filled four ....., two with dry ambient air (give dew point) and two with ... (what is "synthetic standard air"? How is it different from real air?).. with CH4 (delete "concentrations" - the units make it clear what the quantity is (which is not concentration, anyway)).***

We have changed the term to “synthetic CH<sub>4</sub>-in-air gas”. This type of gas is produced by diluting pure CH<sub>4</sub> gas with synthetic air, which is a mixture of N<sub>2</sub> and O<sub>2</sub> at atmospheric fractions (for some cases plus Ar). We have changed the term “concentration” to “mole fraction”.

***P12L12: .. after transport to... (throughout)***

Corrected as suggested.

***P12L14-15: "Calibration offsets" is too vague.***

We replace the term with “difference”.

***P12L21: "scale compression" should be defined.***

We have added an explanation in the revised manuscript.

***P12L22: what are the differences in matrix?***

The ambient air (MD1 and MD2) was made by compressing natural ambient air with only water vapor removed. It consists of major atmospheric components (N<sub>2</sub>, O<sub>2</sub> and Ar) with many atmospheric trace gases (CO<sub>2</sub>, CH<sub>4</sub>, hydrocarbons etc.). In contrast, the synthetic CH<sub>4</sub>-in-air gas was produced by diluting pure CH<sub>4</sub> gas with so-called synthetic air from which most carbonated compounds were removed. Presence/absence of specific gas and resultant difference in mole fraction can potentially affect individual processes of CH<sub>4</sub> isotope measurements. We have changed the sentence as follows: ...difference in air matrix i.e. natural versus synthetic air (potential influence of the composition of the bulk gas)...

***P13L12: This title implies something else. Ice cores are not part of the round robin. It is a comparison among labs that measure delta-13CH4 from air extracted from ice cores.***

The subsection title was changed to: Round Robin Comparison among Ice Core Analysis Laboratories.

***P13L20" "elemental"? Do you mean measurements of XCH4 (i.e., CH4 mole fraction)?***

Since we present the isotopic composition of CH<sub>4</sub> only in this study, the term was deleted.

***L13L24-26: A change after 9 years could mean a change at PSU, not necessarily drift in the isotopic composition of CH<sub>4</sub> in the cylinders. What happened to XCH<sub>4</sub>? Did it drift? If not, could CH<sub>4</sub> isotopic composition change without a change in XCH<sub>4</sub>? If so, how?***

We cannot exclude possibility that any instrument condition at PSU changed after 9 years, but the measurements for two of the three cylinders were in agreement before and after the 9 years, indicating that a change at PSU is less likely.

Concerning change in CH<sub>4</sub> mole fraction, measurements before and after the round robin indicate slight drifts (1–2 ppb) for the cylinder with the middle and low CH<sub>4</sub> mole fractions (CA 71560 and CA 01179, respectively). As the reviewer questions, the change in  $\delta^{13}\text{C-CH}_4$  may be associated with the drift in CH<sub>4</sub> mole fraction. However, the determinate cause, including relation between  $\delta^{13}\text{C-CH}_4$  and CH<sub>4</sub> mole fraction, has yet to be resolved.

***P14L5: The level of agreement depends on your perspective.***

Indeed, however, here we give the number for level of agreement (0.37 ‰).

***P14L14: suite of cylinders...***

Corrected as suggested.

***P15L10: "RHUL-INSTAAR offset"? Are they both different from NIWA, which offsets are calculated from, by the same amount? I suggest "difference" rather than "offset".***

Corrected as suggested.

***P15L12-13: With such large "n", the uncertainty on the difference is deceptively small. SD would be more representative of true uncertainty in the difference, since their could be drifts over time in one measurement vs another.***

According to the suggestion, we use SD for these differences.

***P15L14: data were corrected...***

Corrected as suggested.

***P15L20: among laboratories***

Corrected as suggested.

***P15I21: delete "It has also happened that"***

Corrected as suggested.

***P15L27-P16L1: Fig. 2 combines....***

Corrected as suggested.

***P16L11: delete "that" or rewrite as "stability ... 1992 to 2007 continues until 2011."***

Corrected as suggested.

***P16L17-18: was the GC-IRMS with the post separation column used to define the empirical correction in L15 or the DI-IRMS?***

The sentence was misleading. We have changed it to: The GC-IRMS system is currently equipped with a post-combustion separation column to eliminate the Kr interference.

***P16L22,L25: rather than say "high" or "middle" cylinder, why not ...for CH4 at ~X ppb to make it clear?***



We have specified the mole fractions or cylinder numbers at various places.

***P17L2: it can not be the "calibration" that is propagated, but rather a standard or standard scale.***

The term has been replaced with “standard scale”.

***P17L3: Since standard scales were never defined, I'm not sure what "primary calibration" refers to? It should be calibration of the instrument at MPI with primary standards, what ever they are.***

We have defined the standard scale and the term “calibration” in the revised manuscript.

***P17L14: it is the scales, not the calibrations that are important.***

Corrected as suggested.

***P17L14-15: what does "their" refer to? Since Sperlich's affiliation is given as NIWA, then is this difference between IMAU and NIWA?***

The sentence has been corrected to make it clear.

***P17L22: delete "has".***

Corrected as suggested.

***P18L7: "instrument circumstance" is too vague.***

The sub-sentence has been deleted.

***P18L18: both use the same scale.***

Corrected as suggested.

***P18L26: update of the standard scale or the method used to calibrate the response of the instrument with that scale?***

“Calibration” has been replaced with “standard scale”.

***P19L12: "intercomparison in this study"? The round robin?***

This has been corrected to: The intercomparison between UHEI and MPI-BGC in this study...

***P19L16: ...comparison described by Nisbet?***

This has been changed to: ...an intercomparison presented by Nisbet (2005), ...

***P20L5: This is the best comparison after correction for Kr interference, so why is excluded from Fig.2a?***

The Kr interference was not removed for this comparison. We have nevertheless added this result to the figure.

***P20L18: internal standard?***

We keep this term as is, because it does not necessarily mean drift of the standard scales but possibly erroneous propagation of standard scales to internal working gases (which we refer to as “calibration” in this study) at either laboratory.

***P21L2: measurements of air in cylinders exchanged between... How many cylinders?***

Corrected as suggested. We have also added the number of cylinders (2).

***P21L3: applied an offset correction (delete "to").. to all data.. (delete "the")***

Corrected as suggested.

***P22L1: replace "shows the offset to be" with "gives"***

Corrected as suggested.

***P23L10: what makes these "programs"?***

We have replaced “programs” to “results”.

***P23L11: The results are about measurement offsets; they do not address differences in standard scales directly.***

We have replaced “calibration” to “measurement”.

***P23L15: among labs...***

Corrected as suggested.

***P24L3: atmospheric CH4 level - when? modern?***

We have added the word “modern”.

***P24L26: ...similar to...***

Corrected as suggested.
